# Supplementary material
Source: PubMed Central journal article supplement (PMC7965682)
Supplement: 4089_table.pdf [file 4089_table.pdf]

**On-line Table: Characteristics of patients and incidental thyroid nodules reported on CT and MRI by reporting styles**

|                                  | All Nodules | Reported in "Impression" |                       | Ultrasound Recommended  |            |                       |                         |
|----------------------------------|-------------|--------------------------|-----------------------|-------------------------|------------|-----------------------|-------------------------|
|                                  |             | Nodules                  | Univariate<br>P Value | Multivariate<br>P Value | Nodules    | Univariate<br>P Value | Multivariate<br>P Value |
| No. (%)                          | 375         | 138 (37)                 |                       |                         | 69 (18)    |                       |                         |
| Female (No.) (%)                 | 250 (67)    | 93 (67)                  | .82                   |                         | 46 (67)    | .1                    |                         |
| Mean age (yr) (SD)               | 64 (14)     | 64 (15)                  | .62                   |                         | 62 (13)    | .21                   |                         |
| Study indication (No.) (%)       |             |                          |                       |                         |            |                       |                         |
| Malignancy                       | 196 (52)    | 44 (32)                  | <.0001                | .45                     | 13 (19)    | <.0001                | <.01                    |
| Vascular                         | 63 (17)     | 30 (22)                  |                       |                         | 16 (23)    |                       |                         |
| Trauma                           | 43 (11)     | 21 (15)                  |                       |                         | 8 (12)     |                       |                         |
| Inflammation/infection           | 24 (6)      | 15 (11)                  |                       |                         | 11 (16)    |                       |                         |
| Other                            | 49 (13)     | 28 (20)                  |                       |                         | 21 (30)    |                       |                         |
| Radiologist experience (No.) (%) |             |                          |                       |                         |            |                       |                         |
| 0–4 years                        | 144 (38)    | 50 (36)                  | .12                   |                         | 24 (35)    | .03                   | .65                     |
| 5–9 years                        | 78 (21)     | 23 (17)                  |                       |                         | 8 (12)     |                       |                         |
| ≥10 years                        | 153 (41)    | 65 (47)                  |                       |                         | 37 (54)    |                       |                         |
| Radiology division (No.) (%)     |             |                          |                       |                         |            |                       |                         |
| Chest imaging                    | 92 (25)     | 40 (29)                  | <.0001                | .03                     | 29 (42)    | <.0001                | <.05                    |
| Neuroradiology                   | 103 (27)    | 52 (38)                  |                       |                         | 25 (36)    |                       |                         |
| Abdominal imaging                | 172 (46)    | 40 (29)                  |                       |                         | 10 (14)    |                       |                         |
| Other                            | 8 (2)       | 6 (4)                    |                       |                         | 5 (7)      |                       |                         |
| Nodule size <sup>a</sup>         |             |                          |                       |                         |            |                       |                         |
| Mean size (mm) (SD)              | 14.5 (8.8)  | 16.9 (9.8)               | <.0001                | <.0001                  | 15.4 (7.4) | .40                   |                         |
| <10 mm (No.) (%)                 | 71 (37)     | 21 (22)                  |                       |                         | 11 (21)    |                       |                         |
| 10–14 mm (No.) (%)               | 51 (27)     | 31 (32)                  |                       |                         | 19 (37)    |                       |                         |
| 15–19 mm (No.) (%)               | 24 (13)     | 12 (13)                  |                       |                         | 7 (13)     |                       |                         |
| ≥20 mm (No.) (%)                 | 44 (23)     | 32 (33)                  |                       |                         | 15 (29)    |                       |                         |
| Size not reported (No.) (%)      | 185 (49)    | 42 (30)                  |                       |                         | 17 (25)    |                       |                         |
| Nodule morphology (No.) (%)      |             |                          |                       |                         |            |                       |                         |
| Not described                    | 306 (82)    | 110 (80)                 | .07                   |                         | 57 (83)    | .19                   |                         |
| Calcified                        | 63 (17)     | 23 (17)                  |                       |                         | 9 (13)     |                       |                         |
| Cystic                           | 4 (1)       | 4 (3)                    |                       |                         | 2 (3)      |                       |                         |
| Hyperenhancing                   | 2 (0.5)     | 1 (0.7)                  |                       |                         | 1 (1)      |                       |                         |
| Nodule multiplicity (No.) (%)    |             |                          |                       |                         |            |                       |                         |
| 1 Nodule                         | 222 (59)    | 91 (66)                  | .17                   |                         | 48 (70)    | .25                   |                         |
| 2 Nodules                        | 12 (3)      | 4 (3)                    |                       |                         | 2 (3)      |                       |                         |
| 3 Nodules                        | 2 (0.5)     | 0                        |                       |                         | 0          |                       |                         |
| Multiple, not specified          | 139 (37)    | 43 (31)                  |                       |                         | 19 (28)    |                       |                         |
| Suspicious lymphadenopathy (No.) | 0           |                          |                       |                         |            |                       |                         |

<sup>a</sup> Percentages for size categories do not include ITNs with no size description.
